# Supplementary material
Source: PubMed Central journal article supplement (PMC3745597)
Supplement: 13_037_Ueba.Suppl.pdf [file 13_037_Ueba.Suppl.pdf]

Supplemental Data

Suppression of Coronary Atherosclerosis by Helix B Surface Peptide, a Nonerythropoietic, Tissue-Protective Compound Derived from Erythropoietin

Hiroto Ueba,<sup>1</sup> Masashi Shiomi,<sup>2</sup> Michael Brines,<sup>3</sup> Michael Yamin,<sup>3</sup> Tsutomu Kobayashi,<sup>2</sup> Junya Ako,<sup>1</sup> Shin-ichi Momomura,<sup>1</sup> Anthony Cerami,<sup>3</sup> and Masanobu Kawakami<sup>1</sup>

Online address: <http://www.molmed.org>

The Feinstein Institute for Medical Research 

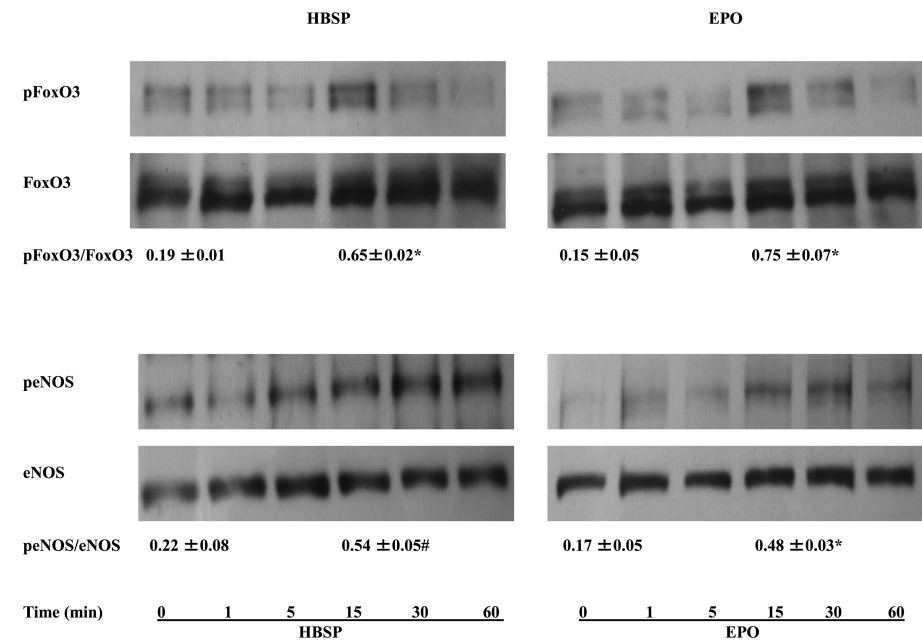

**Supplementary Figure S1.** HBSP and EPO activate FoxO3 and eNOS. HUVECs were incubated with HBSP (2.0 nmol/L) or EPO (10,000 IU/L) for the indicated times and cell lysates were prepared. Next, Western blot was performed as described in Materials and Methods. Immuno-reactive bands were analyzed by densitometry using NIH ImageJ and ratios of the phospho/total antibody immuno-labeling were calculated. The ratios were compared between 0 min and 15 min. Mean ± SEM, n=3 each group; \*P<0.01, #P<0.05.
